# Supplementary material
Source: PubMed Central journal article supplement (PMC6720130)
Supplement: NIHMS1521897-supplement-007061_-_Supplemental_Material.pdf [file NIHMS1521897-supplement-007061_-_Supplemental_Material.pdf]

## SUPPLEMENTAL MATERIAL

**Supplemental Table.** Inactivation parameters of L-type  $\text{Ca}^{2+}$  current ( $I_{\text{CaL}}$ ) in control and heart failure (HF).

| $I_{\text{CaL}}$ parameter | Control    |       | HF         |       |
|----------------------------|------------|-------|------------|-------|
|                            | Experiment | Model | Experiment | Model |
| Peak (A/F)                 | 12.0±0.9   | 12.7  | 11.4±1.1   | 13.1  |
| $\tau$ fast (ms)           | 16.4±0.4   | 28.5  | 19.6±0.6   | 28.4  |
| Amplitude fast (%)         | 78.2±1.1   | 76.8  | 80.7±1.9   | 76.6  |
| $\tau$ slow (ms)           | 86.9±4.2   | 119.7 | 106.8±6.5  | 114.6 |
| Amplitude slow (%)         | 21.8±1.1   | 23.2  | 19.3±1.9   | 23.4  |

Inactivation parameters of  $I_{\text{CaL}}$  were assessed at 0 mV by biexponential fitting of the current decay.  $I_{\text{CaL}}$  parameters measured in isolated cardiomyocytes are expressed as mean±SEM. n=6 cells from 3 animals for both control and HF. See Methods for details of  $I_{\text{CaL}}$  modeling.

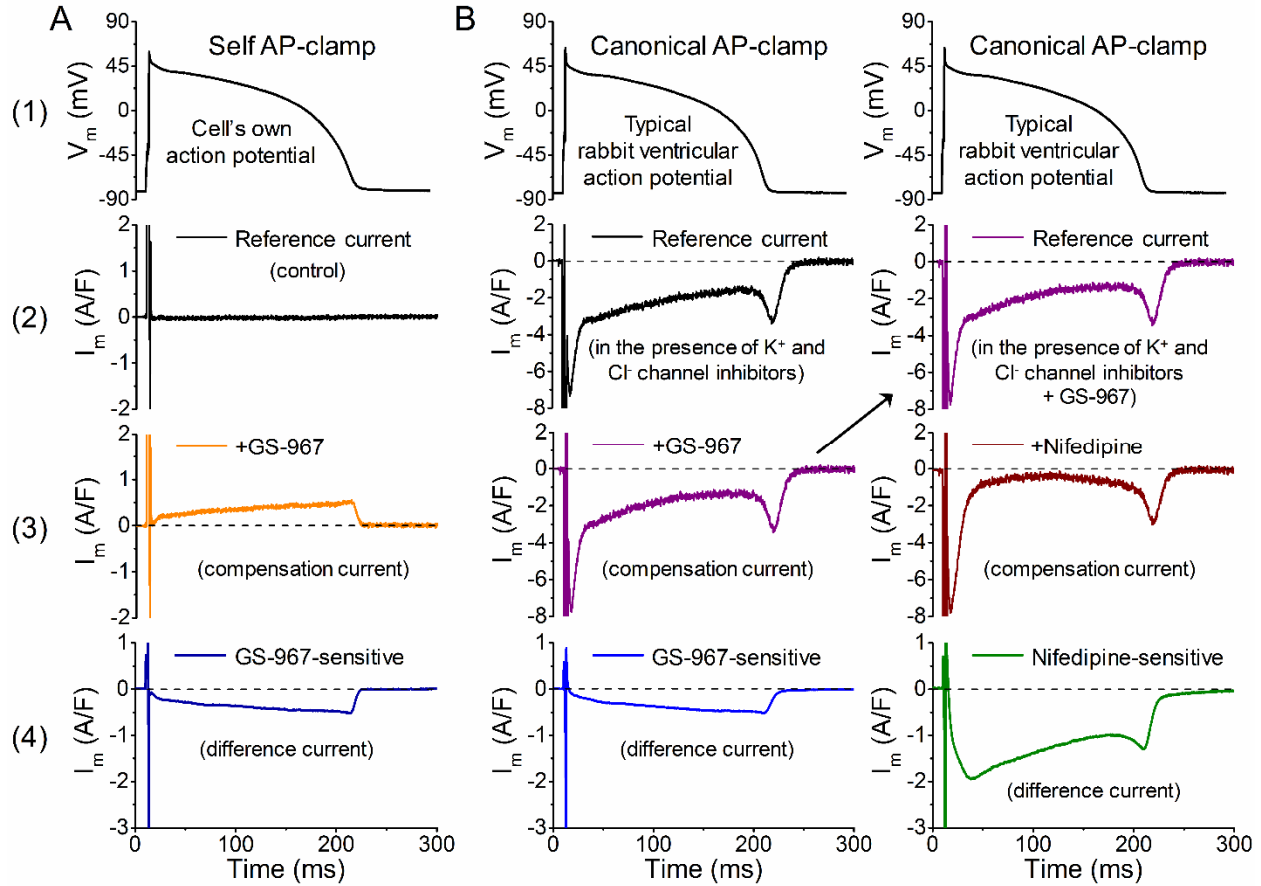

**Supplemental Figure I. Action potential (AP)-clamp technique.**

Representative traces show the basic steps of self AP-clamp (**A**) and canonical AP-clamp (**B**) experiments. First, using an AP as voltage command (1) a reference current is recorded (2). Next, when the drug is applied and reached its steady-state effect, a compensation current is recorded specific to the drug action (3). The drug-sensitive current is obtained as the difference current (i.e. subtracting the compensation current from the reference current) (4). In self AP-clamp (**A**) the cell's own steady-state AP is applied and the reference current should be zero. When the cell is pretreated with different ion channel inhibitors and a prerecorded, typical rabbit AP (canonical AP-clamp, **B**) is applied, the reference current is no longer flat. However, the reference current still must reach a steady-state indicating stable seal conditions. Under AP-clamp, all ionic currents were recorded as difference currents after their specific blocker had reached steady-state effect (3-min perfusion). 60 consecutive traces were recorded (to evaluate the stability of the reference and compensation currents) and averaged in each case before and 3-min after drug application. 1  $\mu\text{mol/L}$  GS-967 and 10  $\mu\text{mol/L}$  nifedipine were used to measure late  $\text{Na}^+$  current ( $I_{\text{NaL}}$ ) and L-type  $\text{Ca}^{2+}$  current ( $I_{\text{CaL}}$ ), respectively.

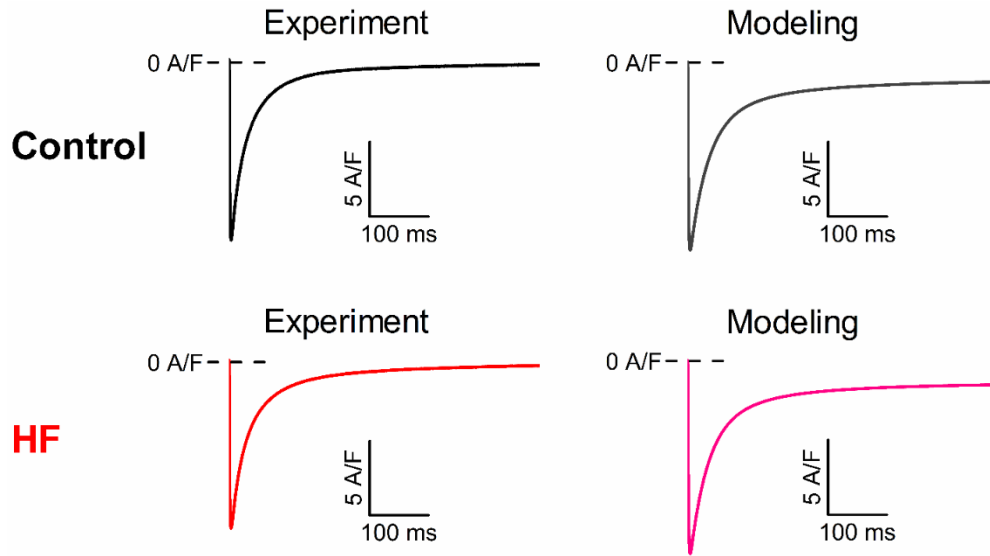

**Supplemental Figure II. Modeling of L-type  $\text{Ca}^{2+}$  current ( $I_{\text{CaL}}$ ) in control and heart failure (HF).** Representative  $I_{\text{CaL}}$  traces measured at 0 mV with square pulse voltage protocol in isolated cardiomyocytes (left) and in silico (right) in control (black/grey) and in HF (red/pink).  $I_{\text{CaL}}$  was measured in the presence of 5 mmol/L EGTA ( $[\text{Ca}^{2+}]_i=100$  nmol/L) in the pipette. Inactivation parameters of  $I_{\text{CaL}}$  are shown in Figure 4E and Supplemental Table.

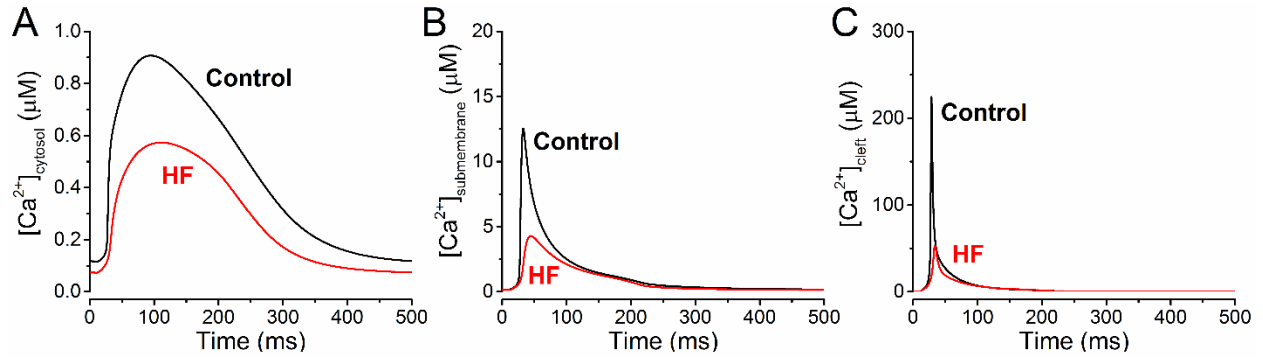

**Supplemental Figure III. Physiological  $Ca^{2+}$  transient in control and heart failure (HF).**

Physiological  $Ca^{2+}$  transients have been obtained with our updated rabbit ventricular myocyte model that integrates detailed descriptions of electrophysiology,  $Ca^{2+}$  and  $Na^{+}$  handling, PKA and CaMKII signaling, and myofilament contraction. Simulated  $Ca^{2+}$  transients under AP-clamp at 2 Hz pacing in control and HF in the cytosol (A), in the submembrane compartment (B), and in the dyadic cleft (C).

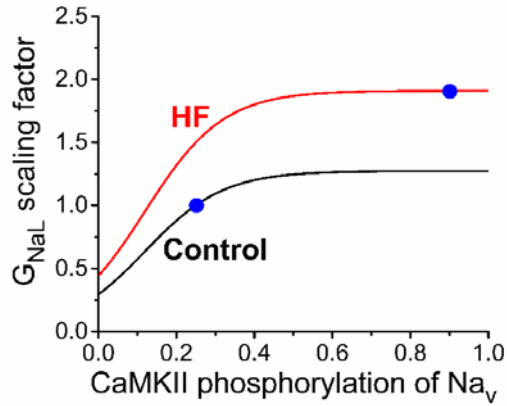

**Supplemental Figure IV. Modeling the CaMKII-dependent modulation of late  $Na^+$  current ( $I_{NaL}$ ).** Relationship between the CaMKII-dependent phosphorylation of voltage-gated  $Na^+$  channel ( $N_{aV}$ ) and the conductance of late  $Na^+$  current ( $G_{NaL}$ ). The scaling factor that multiplies the basal  $G_{NaL}$  value of 0.0527 is shown (control in black, HF in red). Basal  $G_{NaL}$  is increased by 50% in HF. By design, the scaling factor is 1 for control with physiologic  $Ca^{2+}$  transient at 2 Hz pacing. CaMKII-dependent  $N_{aV}$  phosphorylation is  $\approx 25\%$  in control and  $\approx 90\%$  in HF with physiologic  $Ca^{2+}$  transient (blue circles).
